# Supplementary material for: Dietary Protein Intake and Physical Function in Māori and Non-Māori Adults of Advanced Age in New Zealand: LiLACS NZ
Source: MDPI journal article supplement (doi:10.3390/nu15071664), 2023-03-29
Supplement: s1 [file s1]

## Supplementary materials

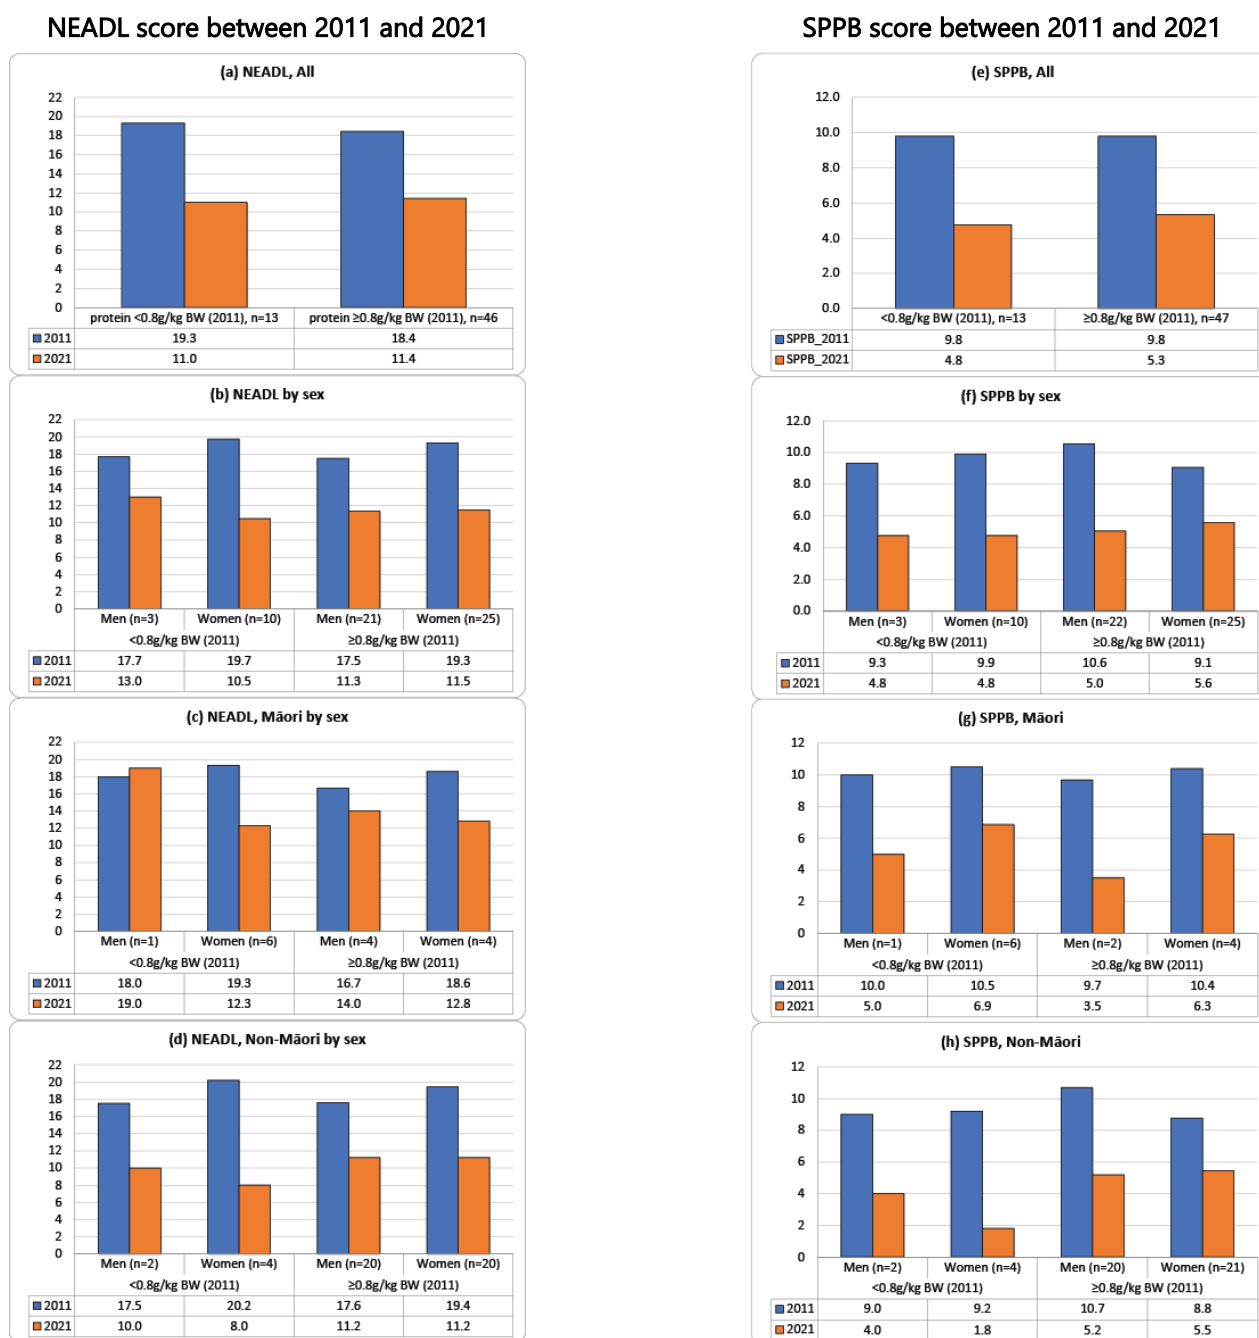

Figure S1. Trend in 2021 NEADL and SPPB scores in Relation to Adequacy of Protein Intake in 2011

NEADL= Nottingham Extended Activities of Daily Living, SPPB = Short Physical Performance Battery

Note – adequacy of protein intake is measured against meeting NZ RDI for protein ≥0.8g/kg BW/day at 2011.

(a) Trend in NEADL score between 2011 and 2021 based on protein intake adequacy in all participants; (b) Trend in NEADL score between 2011 and 2021 based on protein intake adequacy in all participants by gender; (c) Trend in NEADL score between 2011 and 2021 based on protein intake adequacy in Māori participants; (d) Trend in NEADL score between 2011 and 2021 based on protein intake adequacy in Non-Māori participants; (e) Trend in SPPB score between 2011 and 2021 based on protein intake adequacy in all participants; (f) Trend in SPPB score between 2011 and 2021 based on protein intake adequacy in all participants by gender; (g) Trend in SPPB score between 2011 and 2021 based on protein intake adequacy in Māori participants; (h) Trend in SPPB score between 2011 and 2021 based on protein intake adequacy in Non-Māori participants.

Table S1 – GLM Models - Relationship Between 2021 NEADL Score and 2011 Protein Intake in all Participants

| <u>Variables</u>                                       | <u>B (95% CI), P-value</u>    |                                  |
|--------------------------------------------------------|-------------------------------|----------------------------------|
|                                                        | <u>Model 1</u>                | <u>Model 2</u>                   |
| Protein intake 2011 (g/kg BW/day) <sup>a</sup>         | 1.694 (-3.732 - 7.119), 0.541 | 2.461 (-1.806 - 6.729), 0.258    |
| Age, years                                             |                               | 0.501 (-0.340 - 1.341), 0.243    |
| Gender (ref: Women)                                    |                               | 1.156 (-1.329 - 3.642), 0.362    |
| Ethnicity (ref: Māori)                                 |                               | -3.446 (-6.818 - -0.074), 0.045* |
| NZ deprivation index - low (ref: High) <sup>a</sup>    |                               | 0.679 (-2.454 - 3.812), 0.671    |
| NZ deprivation index - medium (ref: High) <sup>a</sup> |                               | -4.035 (-6.804 - -1.266), 0.004* |
| Who do you live with (ref: With others)                |                               | 6.304 (3.859 - 8.749), <0.001*   |

<sup>a</sup> NZ Deprivation index: Low – status 1-3, Middle – status 4-7, High – status 8-10

\*Statistically significant at p<0.05

Table S2 - GLM Models - Relationship Between 2021 SPPB Score and 2011 Protein Intake in all Participants

| <u>Variables</u>                                       | <u>B (95% CI), P-Value</u>     |                                |
|--------------------------------------------------------|--------------------------------|--------------------------------|
|                                                        | <u>Model 1</u>                 | <u>Model 2</u>                 |
| Protein intake 2011 (g/kg BW/day) <sup>a</sup>         | 0.1808 (-2.210 - 3.827), 0.600 | 0.117 (-2.879 - 3.113), 0.939  |
| Age, years                                             |                                | 0.207 (-0.416 - 0.830), 0.515  |
| Gender (ref: Women)                                    |                                | -0.303 (-2.114 - 1.508), 0.743 |
| Ethnicity (ref: Māori)                                 |                                | -1.758 (-4.269 - 0.752), 0.170 |
| NZ deprivation index - low (ref: High) <sup>a</sup>    |                                | -0.678 (-2.946 - 1.591), 0.558 |
| NZ deprivation index - medium (ref: High) <sup>a</sup> |                                | -0.576 (-2.616 - 1.464), 0.580 |
| Who do you live with (ref: With others)                |                                | 1.645 (-0.110 - 3.400), 0.066  |

<sup>a</sup> NZ Deprivation index: Low – status 1-3, Middle – status 4-7, High – status 8-10.

\*Statistically significant at p<0.05
